# Compensation masks trophic cascades in complex food webs

Ashkaan K Fahimipour · Kurt E Anderson · Richard J Williams

**Abstract** Ecological networks, or food webs, describe the feeding relationships between interacting species within an ecosystem. Understanding how the complexity of these networks influences their response to changing top-down control is a central challenge in ecology. Here, we provide a model-based investigation of *trophic cascades* — an oft-studied ecological phenomenon that occurs when changes in the biomass of top predators indirectly effect changes in the biomass of primary producers — in complex food webs that are representative of the structure of real ecosystems. Our results reveal that strong cascades occur primarily in low richness and weakly connected food webs, a result in agreement with some prior predictions. The primary mechanism underlying weak or absent cascades was a strong compensatory response; in most webs predators induced large population level cascades that were masked by changes in the opposite direction by other species in the same trophic guild. Thus, the search for a general theory of trophic cascades in food webs should focus on uncovering features of real ecosystems that promote biomass compensation within functional guilds or trophic levels.

**Keywords** Trophic cascades · ecological networks · food webs · compensatory dynamics

## 1 Introduction

2 Trophic cascades occur when changes in an ecosys-  
3 tem's top trophic level propagate down through the  
4 food web and drive changes in the biomass of primary  
5 producers (Hairston et al, 1960; Paine, 1980). Cas-  
6 cades have now been documented in virtually every  
7 type of ecosystem, but neither conceptual nor mathe-  
8 matical theories have been able to explain widespread  
9 variation in observed cascade strengths (Borer et al,  
10 2005; Shurin et al, 2010); in some ecosystems, strong  
11 cascades impact several lower trophic levels while in  
12 others they diminish within a single trophic level  
13 (Heath et al, 2014). Indeed, *trophic trickles* — weak  
14 or absent cascades in response to major changes to  
15 a food web's top trophic level — abound in nature  
16 (McCann et al, 1998; Mikola and Setälä, 1998; Halaj  
17 and Wise, 2001). Given that human actions are dispropor-  
18 tionately altering biomass of top predators (Estes  
19 et al, 2011), there is a pressing need to understand  
20 under what circumstances such changes will or won't  
21 cascade through complex food webs (Terborgh et al,  
22 2010).

23 Food web structure has long been predicted to regu-  
24 late cascade strength (Strong, 1992; Pace et al, 1999;  
25 Polis et al, 2000; Shurin et al, 2010) and the magni-  
26 tudes of indirect effects in general (MacArthur, 1955;  
27 Yodzis, 2000). Indirect tests of this hypothesis have  
28 so far been accomplished by leveraging data on com-  
29 munity features like functional or taxonomic diversity  
30 (Borer et al, 2005; Frank et al, 2006), in hopes that  
31 these proxies for web structure could provide clues to

---

A. Fahimipour  
Institute of Ecology and Evolution  
University of Oregon, Eugene, OR, USA  
E-mail: ashkaan.fahimipour@gmail.com

K. Anderson  
Dept. of Biology  
University of California, Riverside, CA, USA  
E-mail: kurt.anderson@ucr.edu

R. Williams  
Vibrant Data Inc.  
San Francisco, CA, USA  
E-mail: foodwebster@gmail.com

the features of ecological networks that influence the magnitude of cascading top down effects. However results have been mixed, with studies reporting both strong (Frank et al, 2006, 2007; Baum and Worm, 2009) and weak or noisy (Borer et al, 2005; Fox, 2007) associations between diversity measures and cascade strengths. Whether data support assertions that food web structure regulates cascade strengths remains unclear, and a coherent understanding of when relatively strong or weak trophic cascades occur is still lacking.

One impediment to progress is that extensions of cascade theory toward species rich and topologically complex food webs are needed to guide further empirical study. To date, cascade theory has focused largely on understanding variation in cascade strengths in model food chains (Oksanen et al, 1981; McCann et al, 1998; Heath et al, 2014; DeLong et al, 2015) and although extensions of cascade theory to alternate trophic modules exist (Bascompte et al, 2005; Fahimipour and Anderson, 2015), the mechanisms underlying variation in cascade strength in species rich and complex trophic networks remain poorly understood (Holt et al, 2010; Shurin et al, 2010).

Here we use a bioenergetic food web model to explicitly study the emergence of trophic cascades in species rich webs that are representative of the structure of real ecosystems following the invasion of a novel top generalist predator. We demonstrate that the strongest trophic cascades occur in small and weakly connected food webs — a result in agreement with some prior predictions (Pace et al, 1999; Polis et al, 2000; Fox, 2007; Shurin et al, 2010). Moreover, our results reveal that biomass compensation within producer and consumer functional guilds, whereby some species increase in biomass while others decrease proportionately, is the most common mechanism underlying weak or absent trophic cascades. Thus, the search for a general theory of trophic cascades in food webs should focus on uncovering the abiotic and biotic features of real ecosystems that promote or preclude biomass compensation and compensatory dynamics within functional guilds.

## 2 Methods

We implemented a modeling framework similar to that described by Yodzis and Innes (1992) and reviewed by Williams et al (2007). Namely, we generated multitrophic level food web topologies using an ecological niche model (Williams and Martinez, 2000) and simulated the dynamics of energy flows on these generated webs using a bioenergetic model (Yodzis and Innes, 1992; Brown et al, 2004; Brose et al, 2006b; Williams

et al, 2007). This modeling framework was chosen because it is grounded in empirical knowledge about network structure, species parameters and nonlinear interaction dynamics. Previous work has shown that allometric scaling of parameters and complex functional responses are vital for modeling persistent, complex multispecies food webs (Brose et al, 2006b; Boit et al, 2012), particularly when changes in species richness or web topology are imposed (e.g., Dunne and Williams, 2009). Because it is trivial to study cascades in model food webs that collapse upon predator invasion, we take advantage of previously studied features of this bioenergetic model (discussed below) to design more persistent systems that permit the study of cascades in the face of major changes to model web topology.

The niche model is discussed in detail by Williams and Martinez (2000), but briefly a one-dimensional niche axis on the interval  $[0, 1]$  is assumed and each species in the web is randomly assigned a “niche value” on this axis. Species  $i$  consumes all other species with niche values within a range on the axis, which is assigned using a beta function to randomly draw values from  $[0, 1]$ . This approach was used to generate realistic food web topologies (Williams and Martinez, 2000) for 1200 simulations in a factorial design: initial species richnesses of  $S = 10, 15, 20$  and  $25$  were crossed with directed connectance  $C = 0.12, 0.16$  and  $0.2$  as niche model parameters ( $4$  richnesses  $\times 3$  connectances  $\times 100$  iterations = 1200 webs total). These values of  $C$  were chosen because they encompassed a wide range of empirically observed connectance values (Vermaat et al, 2009). Webs that deviated from the precise  $C$  values, contained disconnected nodes, or consisted of disconnected subgraphs were not considered.

Details of the energy flow model and parameters used herein are reviewed by Williams et al (2007). Namely, an allometrically scaled nonlinear bioenergetic model (Yodzis and Innes, 1992) was used to study the dynamics of species biomasses and the occurrence of trophic cascades in niche model webs when they are subject to the invasion of a new predator. We report results from a single ecologically reasonable set of model parameters, though similar results were obtained with other model parameterizations. Biomass dynamics were represented using the governing equations,

$$\frac{dB_i}{dt} = B_i G_i(B) - \sum_{j=\text{consumers}} \frac{x_j y_{ji} B_j F_{ji}(B)}{e_{ji}} \quad (1)$$

$$\frac{dB_i}{dt'} = -x_i B_i + x_i B_i \sum_{j=\text{resources}} y_{ij} F_{ij}(B) - \sum_{j=\text{consumers}} \frac{x_j y_{ji} B_j F_{ji}(B)}{e_{ji}}, \quad (2)$$

describing the dynamics of primary producers (e.g., plants; eq. 1) and consumers (e.g., herbivores, omnivores and higher trophic level predators; eq. 2). Here  $B_i$  is the biomass of species  $i$  and we use  $R$  and  $N$  when referring to producers or consumers respectively. All producers were assumed to have the same body mass,  $M_R = 1$ , and time  $t'$  was scaled with producer growth rate (see Williams et al, 2007 for details). To control for effects of varying productivity on trophic cascade strength, we maintained constant maximum productivity across simulations by assuming a system-wide carrying capacity  $K$  that is shared amongst  $n_R$  producer populations according to  $K_i = K/n_R$ . Because of the well-documented effects of system productivity and enrichment on cascade strengths (e.g., Chase, 2003) we sought to constrain total potential productivity in all food webs, so that our results were not confounded by variation in the number of basal species generated by each niche model web.

In order to reduce the size of the parameter space being explored, all species in a web were assumed to have a constant consumer-resource body size ratio  $Z$  so that the mass of species  $i$  was  $M_i = Z^P$  where  $P$  is the length of the shortest path between species  $i$  and any producer at the base of the web. We report simulations in which  $Z = 42$ , so that for instance a linear three-species food chain comprising a producer, intermediate consumer and top predator would contain species with scaled body masses 1, 42 and 1764 respectively. This value of  $Z$  represents the mean predator-prey body mass ratio reported by Brose et al, 2006a, although the results presented herein were not sensitive to the choice of  $Z$  across its biologically relevant range.

The function  $F_{ji}(B)$  is the normalized multi-species functional response for consumer  $j$  and resource  $i$ , developed by Yodzis and Innes, 1992 and extended by others (Brose et al, 2006b; Williams et al, 2007; Williams, 2008). To avoid the collapse of webs following predator invasions and permit the study of cascades after predator invasions, we explicitly considered a functional response that includes processes known to increase food web persistence in this model. These included the addition of mild interspecific consumer interference and slight relaxation of resource consumption when resources are very rare (Brose et al, 2006b).

Adding consumer interference to a multispecies non-linear functional can be represented as

$$F_{ji} = \frac{\omega_{ji} B_i^{1+q}}{B_0^{1+q} + d_i B_j B_0^{1+q} + \sum_k \omega_{jk} B_k^{1+q}}. \quad (3)$$

Here  $d_i$  is a positive constant that sets the amount of interference in the system and the sum in the denominator is over all  $k$  resources consumed by  $j$ . We assumed that interference was weak ( $d_i = 0.5$ ) and set the shape parameter  $q = 0.2$ , which slightly relaxed consumption rates at very low resource biomasses — features that are well within the range of empirically observed functional responses (Brose et al, 2006b; Williams, 2008; Boit et al, 2012). We assume passive resource switching, so  $\omega_{ij} = 1/n_i$  where  $n_i$  is the number of resources consumed by  $j$ .

Metabolic parameters in the bioenergetic model (Yodzis and Innes, 1992; Brose et al, 2006b) are given by

$$x_i = \frac{a_{Ti} M_R^{0.25}}{a_{rk} M_i} \quad (4)$$

$$y_{ij} = \frac{a_{ji}}{a_{Ti}}, \quad (5)$$

where  $M_i$  is the mass of an individual of species  $i$  and  $M_R$  is the mass of primary producers used for normalizing the time scale. The constants  $a_T$ ,  $a_r$  and  $a_j$  ( $mass^{0.25} \times time^{-1}$ ) were previously determined from empirical data on the allometry of metabolism, production and maximum consumption respectively (Brose et al, 2006b). We assumed that all species were invertebrates, and so  $a_r = 1$ ,  $a_T = 0.314$  and  $y_{ij} = 8$  (see Brose et al (2006b) for the derivation of these values). The metabolic parameter  $x_i$  is the mass specific metabolic rate of species  $i$  relative to the time scale of the system and the non-dimensional constant  $y_{ij}$  is the ingestion rate of resource  $i$  by consumer  $j$  relative to the metabolic rate of  $i$ . The function  $G_i(B)$  is the normalized growth rate of producer  $i$ , which follows logistic growth,  $1 - B_i/K_i$ . The parameter  $B_0$  is the half saturation density. The efficiency  $e_{ji}$  is the fraction of the biomass of resource  $i$  consumed by consumer  $j$ , that is assimilated. We assumed efficiency  $e_{ji} = 0.45$  for consumption of producers and  $e_{ji} = 0.85$  for consumption of non-producers (Yodzis and Innes, 1992). We report results for systems in which  $B_0 = 0.25$  and the system-wide carrying capacity  $K = 5$ . The initial biomass of each species was uniformly drawn from  $[0.01, 0.1]$  for all simulations.

217 Simulations were run for 5000 model time steps at  
218 which point a top generalist predator invaded the food  
219 web. We assumed that the predator was an efficient  
220 generalist, with a fixed body mass consistent with a  
221 large secondary consumer ( $M_{predator} = Z^{2.5}$ ) and a  
222 scaled attack rate twice that of other species in the  
223 system. We note that the augmented predator attack  
224 rate is still within the range of empirically observed  
225 values (Peters, 1983). We used a simple rule for es-  
226 tablishing the invading predator's feeding links upon  
227 invasion, where for each simulation the predator had  
228 a probability of 0.5 of establishing a feeding link with  
229 any consumer already present in the web. Consumers  
230 were explicitly defined as species whose shortest path  
231 along the network to any producer  $P = 1$ ; the invader  
232 can consume herbivores or omnivores that are already  
233 present in the web, but not producers or other top  
234 predators. Following the invasion, each system was run  
235 for a further 5000 time steps. Cascade strengths were  
236 measured as  $\log_{10}$  response ratios  $\log_{10} B_{post}/B_{pre}$ ,  
237 where  $B_{post}$  and  $B_{pre}$  are aggregate producer com-  
238 munity biomasses summed over all  $n_R$  producers and  
239 averaged over the final 100 time steps after and before  
240 predator invasions respectively. Biomasses were aver-  
241 aged in order to measure cascades for systems with os-  
242 cillatory behavior in the steady state, which occurred  
243 in some of our simulations. Likewise, consumer level  
244 effects were calculated as  $\log_{10}$  response ratios of ag-  
245 gregate consumer biomass. To ensure predators were  
246 not entering webs in which many species had gone  
247 extinct prior to their arrival, we set a limit on the  
248 maximum allowable number of extinctions prior to in-  
249 vasions at two, using  $B_i < 1 \times 10^{-15}$  as the extinction  
250 threshold. In the event of an extinction before pred-  
251 ator arrival, we allowed the extinct taxa to reinvade  
252 the system at an initial biomass equal to the extinc-  
253 tion threshold. Numerical integration of ordinary dif-  
254 ferential equations was accomplished using the *deSolve*  
255 package in R (R Core Team, 2015).

256 To study whether features of the initial network  
257 structure were related to the response of systems to in-  
258 vading predators, we calculated associations between  
259 the cascade strengths and a suite of common network  
260 properties (Vermaat et al, 2009) using *ANOVA*. The  
261 properties we considered were connectance, species  
262 richness, characteristic path length, the fraction of  
263 species that are basal, intermediate and omnivorous,  
264 clustering coefficient, mean maximum trophic similar-  
265 ity and Clauset-Newman-Moore modularity (Clauset  
266 et al, 2004). We note that the frequentist statistical  
267 tests employed here were not used to assess signifi-  
268 cance since p-values are determined by the number  
269 of simulations. Instead, we follow the suggestion of

270 White et al (2014) and use *ANOVA* as a framework for  
271 partitioning effect sizes and variance in these simula-  
272 tions and comparing effect sizes among covariates. We  
273 refer to these effects below using the notation  $\beta_{variable}$   
274 where for instance  $\beta_C$  is the connectance effect, which  
275 reflects the per unit impact of scaled  $C$  on the strength  
276 of cascades. Covariates were rescaled according to Gel-  
277 man (2008) prior to analyses, to facilitate comparisons  
278 of estimated effects between different predictors that  
279 are necessarily on different scales.

280 Finally, we sought to understand the mechanisms  
281 underlying weak trophic cascades, as these cascades  
282 would be least likely detected in empirical studies.  
283 We operationally defined *weak cascades* as a less than  
284 twofold change in aggregate producer biomass after  
285 predator invasions. Under this definition, the mean  
286 cascade strength observed in terrestrial systems re-  
287 ported by Shurin et al (2002) would be considered  
288 weak (mean non-significant change by a factor of 1.1)  
289 whereas the average cascade strength reported for  
290 aquatic systems would be considered strong (mean  
291 change by a factor of 4.6). One possibility is that  
292 weak cascades are caused by diffuse predator effects  
293 (*sensu* Yodzis, 2000), whereby predator consumption  
294 is spread over multiple resources leading to overall  
295 weak population responses. In this scenario, species  
296 in each lower trophic level change only slightly in the  
297 same direction, and large community level biomass re-  
298 sponses fail to emerge. Alternatively, weak cascades  
299 could occur in the presence of major changes to pop-  
300 ulation biomasses if changes in strongly depressed  
301 species are offset by compensatory changes in the op-  
302 posite direction by others (i.e., biomass compensation;  
303 Gonzalez and Loreau, 2009) in the producer or con-  
304 sumer guilds. To quantitatively assess these possibil-  
305 ities, we present a measure  $\mu$  that quantifies the de-  
306 gree of biomass compensation among populations  $i$  in  
307 a trophic guild as

$$\mu = 1 - \frac{|\sum_{i \in n} B_{i,post} - B_{i,pre}|}{\sum_{i \in n} |B_{i,post} - B_{i,pre}|} \quad (6)$$

308 where the sum is over all  $n$  species in a trophic guild  
309 (e.g., all producers). This metric  $\mu$  varies from 0 to  
310 1, with 0 indicating that all species within a guild  
311 changed in the same direction (the biomass of all pop-  
312 ulations increased or decreased) and 1 indicating per-  
313 fect compensation. If weak trophic cascades are typ-  
314 ically accompanied by small  $\mu$  values, then we con-  
315 clude that weak cascades usually occur because top  
316 down effects are too diffuse to effect strong changes in  
317 individual producer populations and therefore aggre-  
318 gate producer biomass. Conversely, if weak cascades

are typically accompanied by large  $\mu$ , then we conclude that compensatory changes by species in the same guild lead to a small net changes in aggregate biomass. Herein, we refer to compensation in producer and consumer guilds as  $\mu_R$  and  $\mu_N$ .

### 3 Results

Predator invasions had moderate effects on aggregate producer biomass in most food webs (Fig. 1). Producers changed by a factor of 1.7 on average across all simulations, and twofold changes in producer biomass occurred in only 31% of webs. Predator facilitation of producers was strongest in low richness and low connectance webs (Fig. 2;  $\beta_S = -0.111$ ,  $\beta_C = -0.012$ ). Cascade strengths were also associated with other topological properties used to describe web structure (Vermaat et al, 2009). The strongest associations were observed between producer response ratios and species richness  $S$ , the fraction of basal species, the fraction of intermediate species and mean maximum trophic similarity (Table 1).

The magnitudes of consumer response ratios were more strongly correlated with most food web properties (Table 1), suggesting that the sensitivity of a guild's log response ratio to initial network conditions may depend on trophic position; topology appears to exhibit relatively strong associations with changes in consumer level biomass following predator invasions compared to lower trophic levels. Depression of consumer biomass by the predator was strongest in low richness and weakly connected webs (Fig. 2;  $\beta_S = 0.741$ ,  $\beta_C = 0.156$ ) with fewer basal species and less modular, more clustered network configurations (Table 1).

Producer compensation  $\mu_R$  was negatively correlated with cascade strengths across all simulations (Fig. 3a; Pearson's  $r = -0.34$ ), suggesting that compensation among producers was in part responsible for masking cascades at the producer community scale (e.g., compare Figs. 3b & 3c). This result is recapitulated by the high frequency of simulations characterized by stronger trophic cascades and almost no producer compensation (Fig. 3a, dark shaded area). Indeed, of the webs that exhibited weak producer cascades (i.e., aggregate producer biomass increased by less than a factor of 2), 90% contained at least one producer population that more than doubled despite a weak community scale cascade. Taken together this suggests that weak cascades were in large part caused by producer compensation, leading to a small net changes in aggregate biomass. However, the magnitude of compensation was weakly correlated with

other topological food web properties (*Supplementary Materials*), suggesting that predicting compensation at the scale of the trophic guild will require more detailed information than simple topological descriptors of ecological network structure.

Compensation in the consumer guild increased with species richness  $S$  and connectance  $C$  (Fig. 4), explaining the shift in consumer effect size distributions toward zero visible in Figs. 1e-h. This suggests that two separate compensation mechanisms could explain weak cascades in webs. The first occurred more frequently in low richness webs, when strong depression of consumers cascaded to producer populations but failed to manifest at the guild scale because changes in some populations were offset by others in the opposite direction (i.e., *producer* compensation). The second occurred primarily in species rich webs (Fig. 4), when top-down predator effects immediately diminished within the consumer guild due to *consumer* compensation. The strongest cascades occurred when both producer and consumer compensation was weak, which was most likely in low richness (lower  $S$ ) and weakly connected (lower  $C$ ) webs.

### 4 Discussion

Our modeling study found that strong trophic cascades at the scale of the producer community are more likely to occur in weakly connected ecological communities with fewer species, a result that is in agreement with some previous interpretations of indirect effects and trophic cascades (MacArthur, 1955; Pace et al, 1999; Frank et al, 2006; Shurin et al, 2010). In most webs (90% of all simulations), at least one producer species doubled or more in biomass, yet strong guild scale cascades occurred in only thirty percent of simulations. Strong population level cascades were often offset by an opposite biomass change in other species so that the overall producer community biomass wasn't strongly affected. Thus, restricting attention to trophic cascades as measured by changes in the overall biomass of a trophic guild makes it much less likely that the effects of an invading species will be detected. Strong top-down effects still occur in large and complex ecological networks, but observing them requires finer-grained observations than simply measuring total producer biomass (Polis et al, 2000). This is exemplified in high richness webs in particular (Figs. 1d, 1h and 2), where changes in producer biomass occurred despite near-zero or slightly positive changes in aggregate consumer biomass on average. In almost all communities, the introduced top species had a strong effect on both the relative biomass of species and the

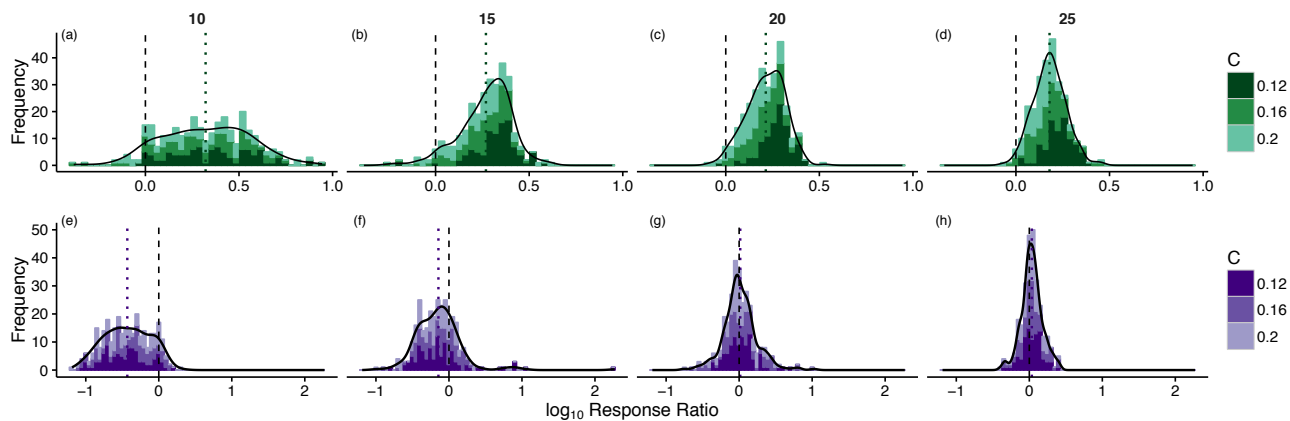

**Fig. 1** Stacked histograms of producer cascade strength frequency distributions for webs of different richness (panel columns) and connectance (green shading) values. The green dotted lines mark mean cascade strengths for reference. (e–h) Consumer cascade strength frequency distributions for webs of different richness (panel columns) and connectance (purple shading) values. The purple dotted lines mark mean consumer cascade strengths for reference. Density estimation was accomplished using a Gaussian kernel.

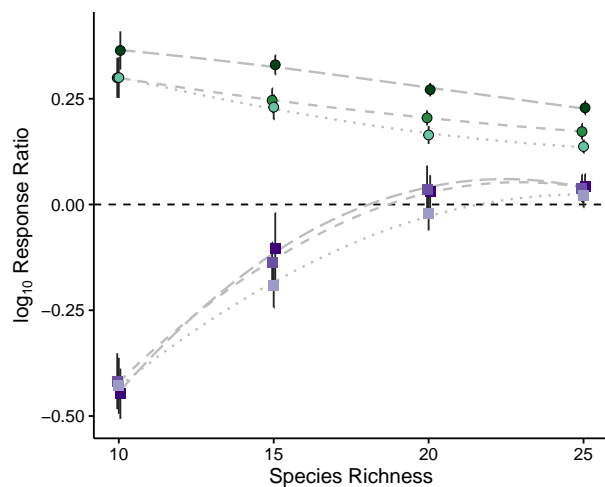

**Fig. 2** Relationships between species richness  $S$ , connectance  $C$  and cascade strengths in the producer (green circles) and consumer (purple squares) guilds. Points and error bars represent mean cascade strength  $\pm 2$  SEM and lines show results of *loess* regression to raw simulated data. Colors are the same as in Fig. 1. Dotted, short and long dashed lines correspond to webs with connectance values of 0.12, 0.16 and 0.2 respectively.

dynamics of the community. Shifts in species composition due to compensation within a guild are more common than changes in overall community biomass, and may be a potentially potent indicator for species invasions (Schmitz, 2006).

Weaker cascades in large highly connected webs have been attributed to diffuse interactions among trophic levels in these systems (Leibold et al, 1997; Pace et al, 1999; Shurin et al, 2010). However, the observation that compensation frequently operated in multiple trophic guilds suggests a new hypothesis for

the emergence of trophic cascades in complex food webs. Namely, changes at the top of webs have some chance of diminishing due to compensation within each trophic guild, as they cascade down to producers. If the network is structured in a way that precludes compensation from occurring in any of these guilds, then a strong cascade will emerge. Alternatively, top-down regulation has the capacity to diminish within a single trophic level if the propensity for compensation is high in that particular system, which can result from particular network architectures or exogenous abiotic forcing in real ecosystems (Gonzalez and Loreau, 2009). Notably, compensation was only weakly correlated with a suite of common topological food web descriptors, and thus additional research is needed to uncover the more nuanced features of food web architecture that drive compensatory responses at the scale of producer and consumer guilds. Experimental tests of the hypothesis discussed herein could be accomplished by adding conspecific generalist predators to replicate food webs with known topologies (e.g., experimentally assembled microcosms) and measuring them repeatedly through time. However, replicated food web experiments with repeated measures are scant and to our knowledge no such data exist to test the results presented here.

The present study looks at the role of increasing web richness and structural complexity on trophic cascades and the detection of the effects of species introductions. The model used, while more complex than those typically used in trophic cascade studies, is still highly idealized. The dynamics of real ecosystems often include many other non-trophic processes (Kéfi et al, 2015) which might dampen (or magnify) the cascading

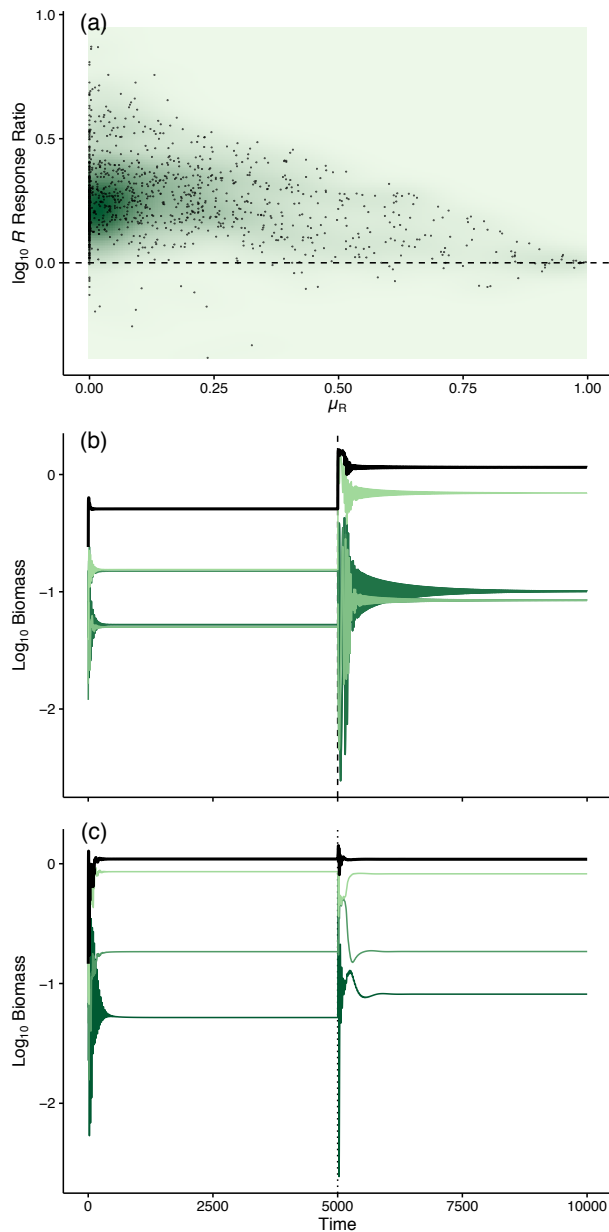

**Fig. 3** (a) Scatterplot showing the negative relationship between the producer cascade strengths and producer compensation,  $\mu_R$ . Points represent individual simulations. The background is shaded according to a 2D Gaussian kernel used for density estimation, where darker shades represent denser regions. A high density of stronger cascades with near-zero producer compensation is visible. (b) Example of a relatively strong cascade where compensation is weak. Colored green lines represent individual producer populations and the thick black line is aggregate producer biomass. A dashed line marks the predator invasion. (c) Example of a weak cascade arising from producer compensation.

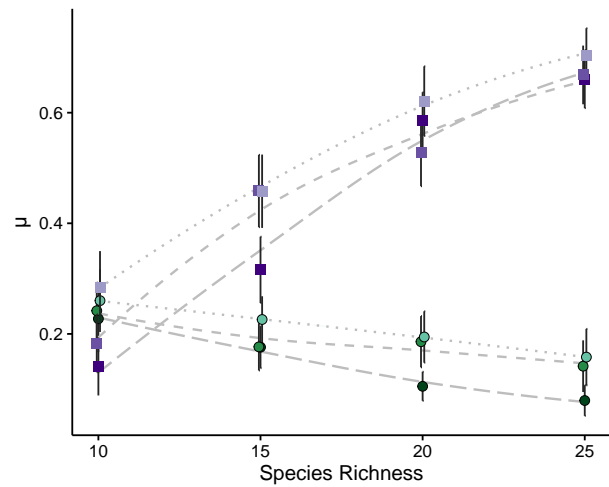

**Fig. 4** Relationships between species richness  $S$ , connectance  $C$  and compensation  $\mu$  in the producer (green circles) and consumer (purple squares) guilds. Points and error bars represent mean compensation  $\pm 2$  SEM and lines show results of *loess* regression to raw simulated data. Colors are the same as in Fig. 1. Dotted, short and long dashed lines correspond to webs with connectance values of 0.12, 0.16 and 0.2 respectively.

466 influence of top predators (Polis et al, 2000). One such  
 467 example is that our study was restricted to models of  
 468 closed systems. Evidence of cross-ecosystem cascades  
 469 (Knight et al, 2005) and the effect of resource coloniza-  
 470 tion rates on cascade strengths (Fahimipour and An-  
 471 derson, 2015) suggest that extensions of our model to  
 472 open systems will be a promising enterprise for further  
 473 theoretical study. Future studies could build upon our  
 474 model by exploring alternate assumptions and struc-  
 475 tures — for instance, other representations of primary  
 476 production like fixed species-level  $K$  (e.g., Brose et al,  
 477 2006b), heterogeneity in resource productivity and ed-  
 478 ibility, different consumer functional responses, alter-  
 479 nate assumptions about consumer metabolism and real-  
 480 istic ecosystem features such as detrital loops (e.g.,  
 481 Boit et al, 2012).

482 Identifying the abiotic and biotic features of ecosys-  
 483 tems that regulate trophic cascades is a fundamental  
 484 issue in ecology (Polis et al, 2000; Terborgh et al, 2010)  
 485 and a practical problem for the management of inva-  
 486 sive species, agricultural pests and zoonotic disease  
 487 (Estes et al, 2011). While the present study identi-  
 488 fies features of model food web architecture that in-  
 489 fluence cascades, the potential for compensation (Gon-  
 490 zalez and Loreau, 2009) which appears to be poorly  
 491 predicted by ecological network structure, complex in-  
 492 direct interactions in real world ecosystems (Yodzis,  
 493 2000) together with insufficient data (Shurin et al,  
 494 2010) and issues of scale (Polis et al, 2000) combine to

**Table 1** Results of ANOVA.  $\beta$  indicates the estimated regression coefficient.

| Guild            | Food Web Property    | $\beta$ |
|------------------|----------------------|---------|
| <i>Producers</i> |                      |         |
|                  | Species Richness     | -0.111  |
|                  | Connectance          | -0.012  |
|                  | Char. Path Len.      | 0.08    |
|                  | Frac. B              | 0.21    |
|                  | Frac. I              | -0.116  |
|                  | Frac. Om             | 0.001   |
|                  | Modularity           | 0.014   |
|                  | Clustering Coef.     | 0.009   |
|                  | Mean Max. Similarity | -0.095  |
| <i>Consumers</i> |                      |         |
|                  | Species Richness     | 0.741   |
|                  | Connectance          | 0.156   |
|                  | Char. Path Len.      | 0.002   |
|                  | Frac. B              | 0.218   |
|                  | Frac. I              | -0.084  |
|                  | Frac. Om             | 0.014   |
|                  | Modularity           | 0.077   |
|                  | Clustering Coef.     | -0.084  |
|                  | Mean Max. Similarity | 0.038   |

495 make the development of a predictive cascade theory  
496 of food webs a difficult problem.

**Acknowledgements** We thank Benjamin Baiser for useful discussions. This work resulted from the *Dynamics of and on Networks* workshop at the Santa Fe Institute in Santa Fe, NM. AKF was supported by the University of California Office of the President, the National Science Foundation under award no. 006741-002 and the Gordon & Betty Moore Foundation. KEA was supported by the University of California Academic Senate and the National Science Foundation under award no. DEB-1553718.

## References

- Bascompte J, Melián CJ, Sala E (2005) Interaction strength combinations and the overfishing of a marine food web. *Proceedings of the National Academy of Sciences of the United States of America* 102(15):5443–5447
- Baum JK, Worm B (2009) Cascading top-down effects of changing oceanic predator abundances. *Journal of Animal Ecology* 78(4):699–714
- Boit A, Martinez ND, Williams RJ, Gaedke U (2012) Mechanistic theory and modelling of complex food-web dynamics in lake constance. *Ecology letters* 15(6):594–602
- Borer E, Seabloom E, Shurin J, Anderson K, Blanchette C, Broitman B, Cooper S, Halpern B (2005) What determines the strength of a trophic cascade? *Ecology* 86(2):528–537
- Brose U, Jonsson T, Berlow EL, Warren P, Banasek-Richter C, Bersier LF, Blanchard JL, Brey T, Carpenter SR, Blandenier MFC, et al (2006a) Consumer-resource body-size relationships in natural food webs. *Ecology* 87(10):2411–2417
- Brose U, Williams R, Martinez N (2006b) Allometric scaling enhances stability in complex food webs. *Ecology Letters* 9(11):1228–1236
- Brown J, Gillooly J, Allen A, Savage V, West G (2004) Toward a metabolic theory of ecology. *Ecology* 85(7):1771–1789
- Chase JM (2003) Strong and weak trophic cascades along a productivity gradient. *Oikos* 101(1):187–195
- Clauset A, Newman ME, Moore C (2004) Finding community structure in very large networks. *Physical review E* 70(6):066,111
- DeLong J, Gilbert B, Shurin J, Savage V, Barton B, Clements C, Dell A, Greig H, Harley C, Kratina P, et al (2015) The body size dependence of trophic cascades. *The American naturalist* 185(3):354–366
- Dunne JA, Williams RJ (2009) Cascading extinctions and community collapse in model food webs. *Philosophical Transactions of the Royal Society of London B: Biological Sciences* 364(1524):1711–1723
- Estes J, Terborgh J, Brashares J, Power M, Berger J, Bond W, Carpenter S, Essington T, Holt R, Jackson J (2011) Trophic downgrading of planet Earth. *Science* 333(6040):301–306
- Fahimipour AK, Anderson KE (2015) Colonisation rate and adaptive foraging control the emergence of trophic cascades. *Ecology letters* 18(8):826–833
- Fox J (2007) The dynamics of top-down and bottom-up effects in food webs of varying prey diversity, composition, and productivity. *Oikos* 116(2):189–200
- Frank K, Petrie B, Shackell N, Choi J (2006) Reconciling differences in trophic control in mid-latitude marine ecosystems. *Ecology Letters*
- Frank KT, Petrie B, Shackell NL (2007) The ups and downs of trophic control in continental shelf ecosystems. *Trends in Ecology & Evolution* 22(5):236–242
- Gelman A (2008) Scaling regression inputs by dividing by two standard deviations. *Statistics in medicine* 27(15):2865–2873
- Gonzalez A, Loreau M (2009) The causes and consequences of compensatory dynamics in ecological communities. *Annual Review of Ecology, Evolution, and Systematics* 40:393–414
- Hairston N, Smith F, Slobodkin L (1960) Community structure, population control, and competition. *American naturalist* pp 421–425
- Halaj J, Wise DH (2001) Terrestrial trophic cascades: how much do they trickle? *The American Naturalist*



- 157(3):262–281
- Heath M, Speirs D, Steele J (2014) Understanding patterns and processes in models of trophic cascades. *Ecology Letters* 17:101–114
- Holt R, Holdo R, van Veen F (2010) Theoretical perspectives on trophic cascades: Current trends and future directions. *Trophic Cascades*
- Kéfi S, Berlow EL, Wieters EA, Joppa LN, Wood SA, Brose U, Navarrete SA (2015) Network structure beyond food webs: mapping non-trophic and trophic interactions on Chilean rocky shores. *Ecology* 96(1):291–303
- Knight TM, McCoy MW, Chase JM, McCoy KA, Holt RD (2005) Trophic cascades across ecosystems. *Nature* 437(7060):880–883
- Leibold MA, Chase JM, Shurin JB, Downing AL (1997) Species turnover and the regulation of trophic structure. *Annual review of ecology and systematics* pp 467–494
- MacArthur R (1955) Fluctuations of animal populations and a measure of community stability. *Ecology* 36(3):533–536
- McCann KS, Hastings A, Strong DR (1998) Trophic cascades and trophic trickles in pelagic food webs. *Proceedings of the Royal Society of London B: Biological Sciences* 265(1392):205–209
- Mikola J, Setälä H (1998) No evidence of trophic cascades in an experimental microbial-based soil food web. *Ecology* 79(1):153–164
- Oksanen L, Fretwell SD, Arruda J, Niemela P (1981) Exploitation ecosystems in gradients of primary productivity. *American Naturalist* pp 240–261
- Pace M, Cole J, Carpenter S, Kitchell J (1999) Trophic cascades revealed in diverse ecosystems. *Trends in ecology & evolution* 14(12):483–488
- Paine R (1980) Food webs: linkage, interaction strength and community infrastructure. *The Journal of Animal Ecology* pp 667–685
- Peters RH (1983) *The ecological implications of body size*, vol 2. Cambridge University Press
- Polis G, Sears A, Huxel G, Strong D, Maron J (2000) When is a trophic cascade a trophic cascade? *Trends In Ecology and Evolution* 15(11):473–475
- R Core Team (2015) *R: A Language and Environment for Statistical Computing*. R Foundation for Statistical Computing, Vienna, Austria, URL <http://www.R-project.org/>
- Schmitz O (2006) Predators have large effects on ecosystem properties by changing plant diversity, not plant biomass. *Ecology*
- Shurin J, Borer E, Seabloom E, Anderson K, Blanchette C, Broitman B, Cooper S, Halpern B (2002) A cross-ecosystem comparison of the strength of trophic cascades. *Ecology Letters* 5(6):785–791
- Shurin J, Markel R, Mathews B (2010) Comparing trophic cascades across ecosystems. *Trophic Cascades: Predators, Prey, and the Changing Dynamics of Nature* pp 319–336
- Strong D (1992) Are Trophic Cascades All Wet? Differentiation and Donor-Control in Speciose Ecosystems. *Ecology* 73(3):747
- Terborgh J, Holt RD, Estes JA, Terborgh J, Estes J (2010) Trophic cascades: what they are, how they work, and why they matter. *Trophic cascades: predators, prey, and the changing dynamics of nature* pp 1–18
- Vermaat JE, Dunne JA, Gilbert AJ (2009) Major dimensions in food-web structure properties. *Ecology* 90(1):278–282
- White J, Rassweiler A, Samhouri J, Stier A, White C (2014) Ecologists should not use statistical significance tests to interpret simulation model results. *Oikos* 123(4):385–388
- Williams R, Martinez N (2000) Simple rules yield complex food webs. *Nature* 404(6774):180–183
- Williams R, Brose U, Martinez N (2007) Homage to Yodzis and Innes 1992: scaling up feeding-based population dynamics to complex ecological networks. *From energetics to ecosystems*
- Williams RJ (2008) Effects of network and dynamical model structure on species persistence in large model food webs. *Theoretical Ecology* 1(3):141–151
- Yodzis P (2000) Diffuse effects in food webs. *Ecology* 81(1):261–266
- Yodzis P, Innes S (1992) Body size and consumer-resource dynamics. *American Naturalist*
